# Supplementary material for: A sulfonated polyaniline with high density and high rate Na-storage performances as a flexible organic cathode for sodium ion batteries
Source: Royal Society of Chemistry journal article supplement (doi:10.1039/c5cc05654c), 2015-01-01
Supplement: c5cc05654c2.pdf [file c5cc05654c2.pdf]

## Supporting Information

**Title:** A sulfonated polyaniline with high density and high rate Na-storage performances as a flexible organic cathode for sodium ion batteries

Min Zhou, Wei Li, Tiantian Gu, Kangli Wang\*, Shijie Cheng, Kai Jiang\*

### Supporting Information

#### *Experimental Section*

**Material preparation:** The PANS polymer was synthesized via chemical oxidative copolymerization. A typical experimental procedure was to add ammonium persulfate (10 mmol in 1 M HCl 10 mL) dropwise into a mixed solution of 40 mL 1 M HCl containing aniline (2 mmol) and o- aminobenzenesulfonic acid (10 mmol) to initiate the polymerization. The reaction was carried out at 0-5 °C for 12 h. The copolymer was obtained by filtering and rinsing the precipitate with ethanol for several times, and then immersing in a mixture of 20 mL 0.4 M NaOH solution and diluted hydrazine hydrate for 4 h with stirring, and adding the solution slowly to a large excess of acetone thus giving the sodium polyaniline salt. To prepare the PANS/C nanoparticles, the as-prepared PANS polymer was ball-milled with Ketjen Black (KB) for 12 h at a weight ratio of 3:1.

**Structural Characterization:** The morphology of the obtained samples were characterized using field-emission scanning electron microscopy (Zeiss SIGMA FESEM). The structure of as-prepared polymer were determined by X-ray diffraction (XRD) using a PANalytical Multi-Purpose Diffractometer equipped a Cu K $\alpha$  Radiation ( $\lambda=1.5406\text{\AA}$ ). Fourier transformed infrared (FTIR) spectra were recorded on a Bruker VERTEX 70 FTIR spectrometer with KBr pellets. The specific surface area were determined by Brunauer–Emmett–Teller (BET) nitrogen adsorption–desorption measurement on TriStar II 3020. X-ray photoelectron spectroscopy tests were carried out on a KRATOSXSAM800 instrument with the magnesium source Mg K  $\alpha$  1253.6

eV operated at 12.5 kV and 16 mA. Elemental analysis of the chemical composition of the polymer were characterized on Vario Micro cube elemental analyzer (EA). ICP-AES analysis were performed with IRIS Intrepid III XSP.

**Electrochemical Measurements:** The electrode performance of PANS was characterized on 2025 type coin cells with a PANS film as a cathode and a sodium disk as anode, separated with a Cellgard 2400 separator. The PANS cathode consisted of 80% wt. ball-milled PANS/C, 10% wt. Super P and 10% wt. PTFE. To test the capacity contribution from the carbon additive (KB) in the cathode, the electrode performance of KB electrode was carried on 2025 type coin cells with a KB film as a cathode and a sodium disk as anode. The KB film consisted of 90% wt KB, 10% wt PTFE. The electrolyte is 1 mol L<sup>-1</sup> NaPF<sub>6</sub> in a mixture of ethylene carbonate, diethyl carbonate (EC/DEC =1:1 by volume, Shinestar battery materials co. Ltd, China). Cyclic voltammograms were measured on a CHI 660d electrochemical workstation (Shanghai, China) at a scan rate of 0.1 mV s<sup>-1</sup> and the charge-discharge experiments were conducted on a Land CT.

1 SEM image of the bulk PANS

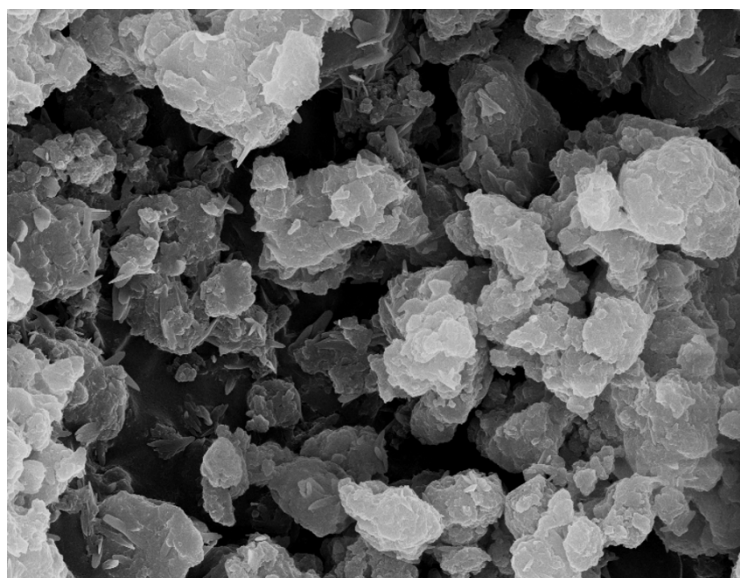

**Fig. S1** SEM image of the as-prepared PANS

## 2. Nitrogen adsorption/desorption isotherms of the polymer

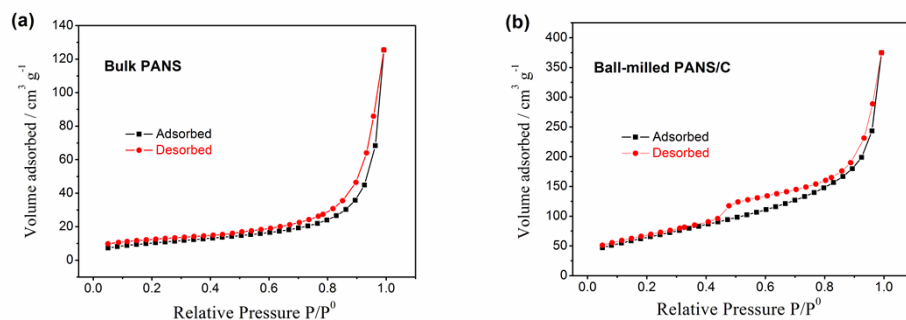

**Figure S2.** Nitrogen adsorption/desorption isotherms of as-prepared PANS (a) and the ball-milled PANS/C nanoparticles(b)

The specific surface area of bulk PANS and PANS/C is calculated to be 37.1, 235.4 m<sup>2</sup> g<sup>-1</sup>, respectively.

## 3. XRD patterns of the as-prepared PANS

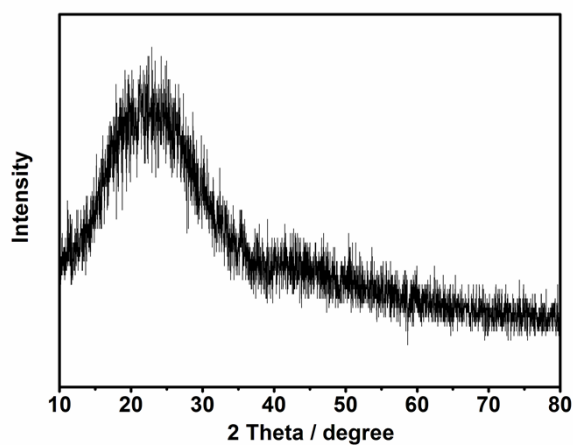

**Figure S3.** XRD patterns of the as-prepared PANS.

#### 4. X-ray photoelectron spectra of the as-prepared PANS

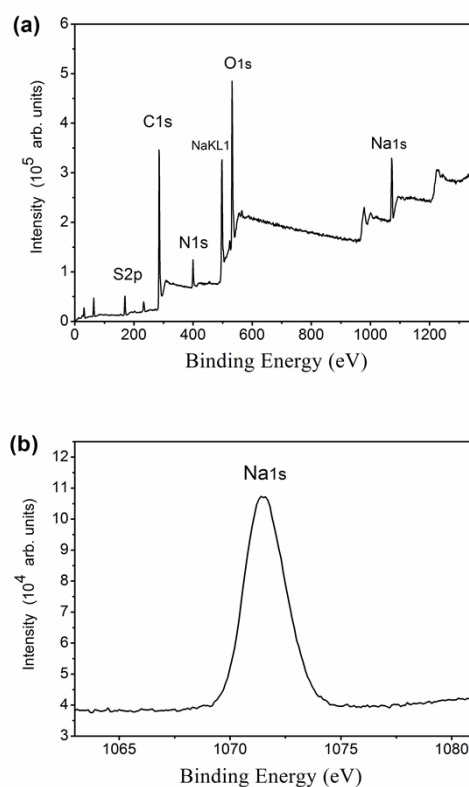

**Figure S4.** (a) X-ray photoelectron spectra of the as-prepared PANS polymer; (b) high resolution image of Na 1s band in (a)

The binding energy for Na 1s electrons appears at 1071.4 eV, which confirms Na in the presence of  $-\text{SO}_3\text{Na}$  state, indicating the  $-\text{SO}_3\text{Na}$  group bound to the polyaniline backbone.

## 5. Elemental composition information of the as-prepared PANS

**Table S1.** Elemental analysis results of the as-prepared PANS

| Element | C.    | H     | N.   | S     | Na    | O      |
|---------|-------|-------|------|-------|-------|--------|
| % wt.   | 50.55 | 4.510 | 8.32 | 9.516 | 8.417 | 18.687 |

Based on the elemental composition analysis and ICP characterization, the composition of PANS polymer can be calculated to be  $[\text{C}_6\text{H}_4\text{N} \cdot \text{C}_6\text{H}_4\text{NSO}_3\text{Na}]_n$ , indicating a  $\sim 50\%$  sulfonation degree.

## 6. Electrochemical performances of the carbon additive (KB) electrode

CV curves of the carbon additive (KB) measured in a voltage range of 1.8 to 3.7 V at a scan rate of  $0.1 \text{ mV s}^{-1}$  Electrochemical performances of the carbon additive (KB) electrode

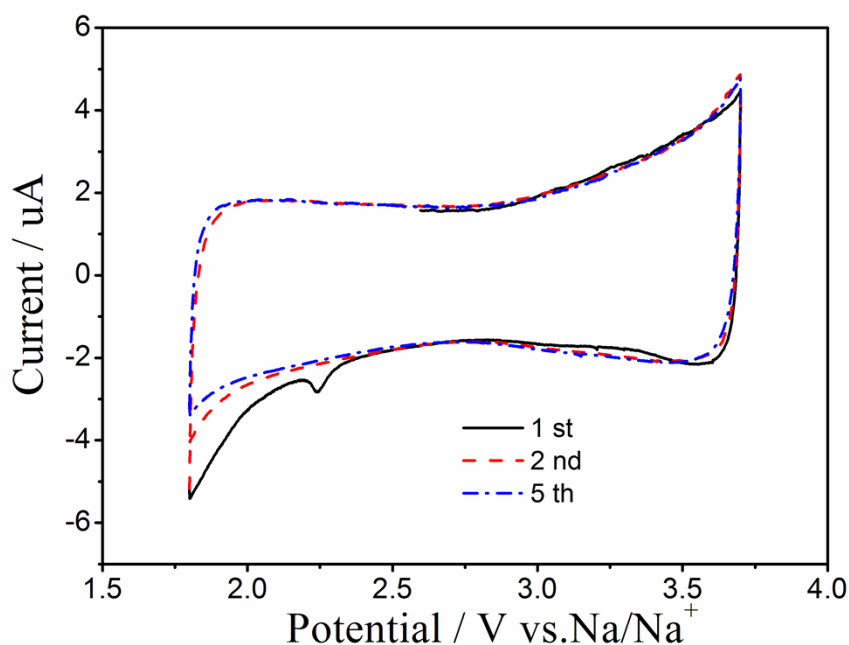

**Figure S5.** CV curves of the carbon additive (KB) measured in  $1.0 \text{ mol L}^{-1} \text{ NaPF}_6 + \text{EC-DEC (V:V=1:1)}$  electrolyte in a voltage range of 1.8 to 3.7 V. Scan rate:  $0.2 \text{ mV s}^{-1}$

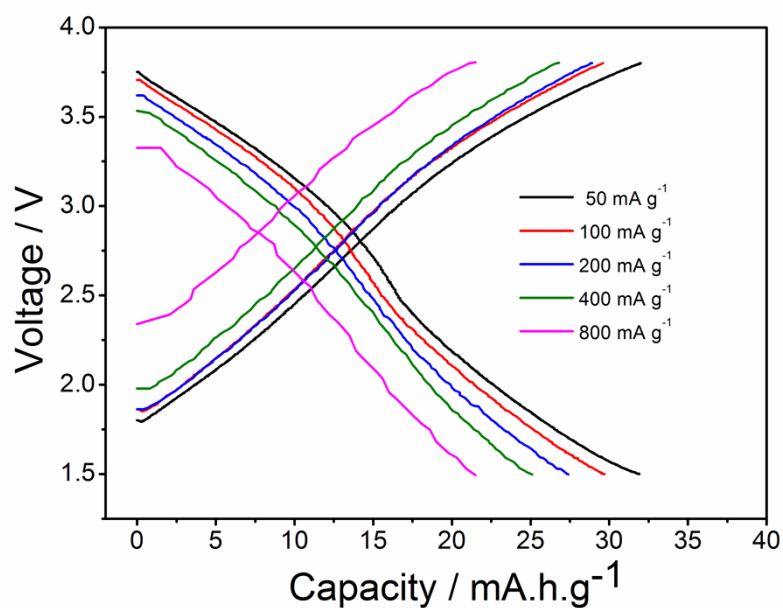

**Figure S6.** The charge-discharge profiles of KB electrode in 1.0 mol L<sup>-1</sup> NaPF<sub>6</sub> +EC-DEC (v/v=1/1) electrolyte at various current densities in a voltage range of 1.5 to 3.8 V.

As shown in Figure S6, the carbon additive KB can deliver 32, 29, 27, 25, 21 mAh g<sup>-1</sup> at the current densities of 50, 100, 200, 400, 800 mA g<sup>-1</sup> in the voltage range of 1.5 to 3.8 V. As the weight ratio of PANS/KB = 3:1, the capacity contribution of the carbon additive is calculated to be 10.6, 9.6, 9, 8.3, 7 mAh g<sup>-1</sup> at 50, 100, 200, 400, 800 mA g<sup>-1</sup>.

## 7. The ratios of Na and polymer in the PANS electrode cycled at different depths of charge and discharge

**Table S2.** The ratios of Na and polymer in the PANS electrode cycled at different depths of charge and discharge

| Number   | States              | Na (mg)/ PANS (g) | $n(\text{Na}) / n(\text{C}_{12}\text{H}_8\text{N}_2\text{SO}_3\text{Na})$ |
|----------|---------------------|-------------------|---------------------------------------------------------------------------|
| <b>a</b> | As-prepared         | 84.17             | 1.04                                                                      |
| <b>b</b> | Charged to 3.8 V    | 5.69              | 0.07                                                                      |
| <b>c</b> | Discharged to 3.0 V | 57.4              | 0.706                                                                     |
| <b>d</b> | Discharged to 1.5 V | 86.56             | 1.06                                                                      |

To quantify insertion and de-insertion of sodium ions upon charge and discharge, the as-prepared PANS electrode (a), charged to 3.8 V (b), discharged to 3.0 V (c) and discharged to 1.5 V (d) were taken out from the disassembled cells and rinsed with pure diethyl carbonate solvent for 3 times. The thick film of PANS/C/PTFE was destroyed by heating in air at 600 °C for 10 h, the sodium oxides obtained was then dissolved in  $\text{HNO}_3$  for the atomic emission analysis using IRIS Intrepid III XSP spectrometer.
